1 **Virucidal efficacy of different formulations for hand and surface**  
2 **disinfection targeting SARS CoV-2**

3

4

5 Katrin Steinhauer<sup>1,2\*</sup>, Toni Luise Meister<sup>3</sup>, Daniel Todt<sup>3,4</sup>, Adalbert Krawczyk<sup>5,6</sup>,  
6 Lars Paßvogel<sup>1</sup>, Britta Becker<sup>7</sup>, Dajana Paulmann<sup>7</sup>, Birte Bischoff<sup>7</sup>, Maren Eggers<sup>8</sup>,  
7 Stephanie Pfaender<sup>3</sup>, Florian H H Brill<sup>7</sup> and Eike Steinmann<sup>3</sup>

8

9 <sup>1</sup>Department Research & Scientific Services, Schülke & Mayr GmbH, Norderstedt,  
10 Germany

11 <sup>2</sup>Faculty of Mechanical Engineering, Kiel University of Applied Sciences, Kiel,  
12 Germany

13 <sup>3</sup>Department of Molecular and Medical Virology, Ruhr University Bochum, 44801  
14 Bochum, Germany

15 <sup>4</sup>European Virus Bioinformatics Center (EVBC), 07743 Jena, Germany

16 <sup>5</sup>Department of Infectious Diseases, West German Centre of Infectious Diseases,  
17 University Hospital Essen, University of Duisburg-Essen, Essen, Germany

18 <sup>6</sup>Institute for Virology, University Hospital Essen, University of Duisburg-Essen,  
19 Essen, Germany

20 <sup>7</sup>Dr. Brill + Partner GmbH Institut for Hygiene and Microbiology, Hamburg, Germany

21 <sup>8</sup>Labor Prof. Gisela Enders MVZ GbR, Rosenbergstr. 85, 70193 Stuttgart, Germany

22

23 **Key words:** SARS-CoV-2, disinfection, virucidal activity, vaccinia, EN 14476

24 **Running title:** Virucidal efficacy of hand and surface disinfectants targeting SARS-

25 CoV-2

26

27

28 **\*For correspondence:**

29 Katrin Steinhauer

30 Schülke & Mayr GmbH

31 Research and Development

32 22840 Norderstedt

33 Germany

34 Tel: +49 40 52100557

35 Fax: +49 40 52100577

36 e-mail: [katrin.steinhauer@schuelke-mayr.com](mailto:katrin.steinhauer@schuelke-mayr.com)

37

38 **Abstract**

39 In the ongoing SARS CoV-2 pandemic effective measures are needed, and  
40 guidance based on the methodological framework of the European committee for  
41 standardization (CEN) can help to choose effective disinfectants on an immediate  
42 basis. This study demonstrates that two commercially available formulations for  
43 surface disinfection and one formulation for hand disinfection claiming “*virucidal*  
44 *activity against enveloped viruses*” are effectively inactivating SARS-CoV-2. This  
45 study emphasizes that chemical disinfectants claiming “*virucidal activity against*  
46 *enveloped viruses*” are an effective choice to target enveloped SARS-CoV-2 as a  
47 preventive measure.

48

## 49 **Introduction**

50 On 30 January 2020 WHO declared the outbreak a novel coronavirus designated  
51 SARS-CoV-2 a public health emergency of international concern (PHEIC), being  
52 WHO's highest level of alarm [1]. Throughout the ongoing SARS-CoV-2 pandemic  
53 from December 2019 through 11 October 2020 over 37 million cases of COVID-19  
54 and 1 million deaths have been reported on a global basis. Recently, within only 1  
55 week (5 October through 11 October 2020) over 2.2 million new cases of SARS-  
56 CoV-2 infections and 39.000 deaths associated with COVID-19 were reported, being  
57 the highest number of cases so far in the ongoing SARS-CoV-2 pandemic [2].

58 In order to prevent further spreading of SARS-CoV-2, the WHO recommended  
59 hygiene measures such as the use of 70 % ethanol [3]. To enable the use of other  
60 suitable disinfectants, the German Robert-Koch-Institute has been recommending  
61 the use of disinfectants claiming at least “virucidal activity against enveloped viruses”  
62 in the context of the SARS-CoV-2-outbreak [4].

63 This recommendation is based on the methodological framework of the European  
64 Committee for Standardization (CEN): CEN has defined a set of surrogate test  
65 organisms, which are representative for certain groups of microorganisms. A proven  
66 efficacy against these representative surrogate test organisms allows efficacy claims  
67 for the respective group of organisms’ e.g. bactericidal, yeasticidal, fungicidal or  
68 virucidal efficacy [5]. For the claim “virucidal activity against enveloped viruses”,  
69 vaccinia virus has been defined as the relevant surrogate organism.

70 As such, disinfectants and antiseptics claiming “virucidal activity against enveloped  
71 viruses”, based on the methodological framework of CEN, can be claimed effective  
72 against all enveloped viruses including coronaviruses such as SARS-CoV-2 [6]. This

73 holds also true for disinfectants claiming “virucidal activity against enveloped viruses”  
74 based on the German DVV/RKI guideline [7].

75 Despite this guidance throughout the ongoing SARS-CoV-2-pandemic question often  
76 arises, of whether a certain formulation has proven efficacy against SARS-CoV-2.

77 Therefore, this study aimed to investigate the efficacy of three different typical  
78 formulations used for hand or surface disinfection against SARS-CoV-2 using the  
79 European Standard EN 14476 protocol. Efficacy data using SARS-CoV-2 were  
80 compared to data obtained with the surrogate test virus vaccinia as defined in EN  
81 14476 and the comparable German DVV/RKI guideline, respectively.

82

## 83 **Material and Methods**

### 84 *Tests strains and cultivation*

85 Test virus suspensions were prepared by infecting susceptible cells with different  
86 multiplicities of infection (MOI). For Modified vaccinia virus Ankara (provided from the  
87 Institute of Animal Hygiene and Veterinary Public Health of the University Leipzig),  
88 BHK-21 cells were used (provided by Friedrich Löffler institute); for vaccinia virus  
89 Elstree (kindly provided by Prof. Sauerbrei, University of Jena, Jena, Germany), CV1  
90 cells (kindly provided by Prof. Sauerbrei, University of Jena, Jena, Germany) were  
91 used. SARS-CoV-2 (strain Essen) was propagated on Vero E6 cells as previously  
92 described [8] .

### 93 *Quantitative Suspension tests according to EN 14476 or DVV/RKI* 94 *guideline*

95 Quantitative suspensions tests were carried out as described in EN 14476 [6] or in  
96 the DVV/RKI guideline [7], and the respective test protocol used is indicated for each  
97 data set. Briefly, efficacy of three commercially available disinfectants was studied

98 against vaccinia virus (strain modified vaccinia virus Ankara (MVA) ATCC VR -1508  
99 or vaccinia virus, strain Elstree) and SARS-CoV-2 using

100 The virus suspension was added to the product test solution and the interfering  
101 substance. A virus control mixture was also assessed using distilled water in place of  
102 the test product. After the specified contact time indicated in table 1, virucidal activity  
103 of the solution was immediately suppressed by dilution with nine volumes of ice-cold  
104 medium (MEM + 2.0% FCS) and serially diluted 10-fold. Due to the immediate  
105 titration, no after-effect of the test product could occur. For each test suspension, 6  
106 wells of a microtitre plate containing a confluent monolayer of the respective host  
107 cells were inoculated with 100  $\mu$ L of test suspension, and the cells were incubated at  
108 37°C in a humidified atmosphere under 5% CO<sub>2</sub>.

109

110 After incubation, the cells were examined microscopically for infectivity and  
111 cytopathic effects (CPE). The virus titers were expressed as tissue culture infectious  
112 dose 50% (TCID<sub>50</sub>/mL). The virucidal activity was determined as the difference  
113 between the logarithmic titer of the virus control minus the logarithmic titer of the  
114 test virus ( $\log_{10}$  TCID<sub>50</sub>/mL). This difference was given as a RF including its 95%  
115 confidence interval. A reduction in virus titer of  $\geq 4 \log_{10}$  (corresponding to an  
116 inactivation of  $\geq 99.99\%$ ) was regarded as evidence of sufficient virucidal activity. The  
117 calculation was performed according to EN14476 [6] or DVV/RKI guideline,  
118 respectively [7].

119

120 A ready-to-use alcohol-based surface disinfectant designated formulation A (trade  
121 name: mikrozyd universal; 100 g contains: 17.4 g propan-2-ol, 12.6 g ethanol (94%);  
122 Schülke & Mayr GmbH, Germany) was used as one test formulation. In addition, a

123 QAC-based formulation for surface disinfection was used, containing quaternary  
124 ammonium compounds designated formulation B (trade name: mikrozyd sensitive;  
125 100 g contains: 0.26 g Alkyl(C12-16)dimethylbenzylammonium-chloride  
126 (ADBAC/BKC (C12-16)); 0.26 g Didecyldimethylammoniumchloride (DDAC), 0.26g  
127 Alkyl(C12-14)ethylbenzyl-ammoniumchloride (ADEBAC (C12-14)). As a third  
128 formulation an alcoholic hand disinfectant based on propan-2-ol was used (trade  
129 name: desmanol pure designated formulation C (100 g contains: 75 g propan-2-ol).  
130 Disinfectant concentrations and contact times used throughout this study were based  
131 on the existing “virucidal efficacy against enveloped viruses” efficacy claims for the  
132 three disinfectants and are indicated. Experiments were carried out under conditions  
133 of low organic soiling (0.3 g/L bovine serum albumin (BSA); “clean conditions”) as  
134 defined in EN 14476 [6] or in the presence of 10% fetal calf serum as defined in the  
135 DVV/RKI guideline [7].

136 All experiments were carried out as independent experiments and data presented  
137 are based on at least two experiments. Validation controls as defined in the test  
138 protocols (EN 14476 or DVV/RKI-guideline) were found to be effective in all  
139 experiments indicating validity of presented data.

140

## 141 **Results and Discussion**

142 Throughout the ongoing SARS-CoV-2 pandemic, effective disinfection protocols are  
143 needed to support prevention strategies worldwide. Thus, we investigated three  
144 different disinfectant formulations in regard to their effectiveness against SARS-CoV-  
145 2, including two formulations for surface disinfection and one hand disinfectant.  
146 Formulations were based on either alcohol or quaternary ammonium compounds  
147 (QACs) with known efficacy against the enveloped vaccinia virus (strain modified

148 vaccinia virus Ankara or strain Elstree, respectively) as established in the European  
 149 Standard EN 14476 and the quite similar German DVV/RKI guideline. [6,7]. In both  
 150 test protocols a logarithmic reduction of the test virus by at least 4 log<sub>10</sub> is required to  
 151 claim “virucidal activity against enveloped viruses”. Data obtained for SARS CoV-2  
 152 by using the EN 14476 test protocol in comparison to data obtained for vaccinia virus  
 153 using either the DVV/RKI or the similar EN 14476 test protocol are summarized in  
 154 Table 1. In preliminary screening experiments due to the cytotoxicity of the tested  
 155 substance the limit of detection did not allow to verify the 4 log<sub>10</sub> requirement of EN  
 156 14476. Thus, further experiments were carried out with either lower concentrations  
 157 and / or the use of large volume plating to the enlarge the detectability threshold.

158

| Formulation | Concentration (% v/v) | Contact time (sec.) | Titre of the virus control (log <sub>10</sub> TCID <sub>50</sub> /ml) SARS-CoV-2 | Logarithmic Reduction Factor (RF) SARS-CoV-2 | Titre of the virus control (log <sub>10</sub> TCID <sub>50</sub> /ml) Vaccinia virus | Logarithmic Reduction Factor (RF) Vaccinia virus |
|-------------|-----------------------|---------------------|----------------------------------------------------------------------------------|----------------------------------------------|--------------------------------------------------------------------------------------|--------------------------------------------------|
| A           | 20                    | 15                  | 6.22                                                                             | <b>≥4.02</b>                                 | 7.44 <sup>a,b</sup><br>± 0.41                                                        | 0 <sup>a,b</sup><br>± 0.40                       |
| A           | 20                    | 30                  | n.d.                                                                             | n.d.                                         | 7.76 <sup>a,b</sup><br>± 0.39                                                        | 0.38 <sup>a,b</sup><br>± 0,40                    |
| A           | 80                    | 15                  | 6.22                                                                             | <b>≥4.02</b>                                 | n.d.                                                                                 | n.d.                                             |
| A           | 90                    | 15                  | n.d                                                                              | n.d.                                         | 7.44 <sup>a,b</sup><br>± 0.41                                                        | <b>≥ 4.25<sup>a,b</sup></b><br>± 0.28            |
| A           | 90                    | 30                  | n.d                                                                              | n.d.                                         | 7.76 <sup>a,b</sup><br>± 0.39                                                        | <b>≥ 4.25<sup>a,b</sup></b><br>± 0.28            |



|   |    |    |      |                           |                               |                                       |
|---|----|----|------|---------------------------|-------------------------------|---------------------------------------|
| B | 10 | 60 | n.d. | n.d.                      | 7.75 <sup>a,c</sup> ±<br>0.33 | 0,25 <sup>a,c</sup><br>± 0,48         |
| B | 20 | 15 | 6.22 | <b>≥4.02</b>              | n.d.                          | n.d.                                  |
| B | 20 | 30 | 6.37 | ≥ 3.17*                   | n.d.                          | n.d.                                  |
| B | 20 | 60 | 6.37 | ≥ 3.17*                   | n.d.                          | n.d.                                  |
| B | 80 | 15 | 6.22 | <b>≥ 4.38<sup>e</sup></b> | n.d.                          | n.d.                                  |
| B | 80 | 30 | 6.37 | <b>≥ 4.38<sup>e</sup></b> | 7.82 <sup>a,c</sup><br>± 0.37 | <b>≥ 4.32<sup>a,c</sup></b><br>± 0,26 |
| B | 80 | 60 | 6.37 | ≥ 2.17*                   | 7.82 <sup>a,c</sup><br>± 0.37 | <b>≥ 4.51<sup>a,c</sup></b><br>± 0,31 |
| C | 20 | 15 | 6.22 | <b>≥ 4.02</b>             | 7.67 <sup>b,d</sup><br>± 0.33 | 0,17 <sup>b,d</sup><br>± 0,58         |
| C | 20 | 30 | 6.22 | ≥ 3.02*                   | n.d.                          | n.d.                                  |
| C | 80 | 15 | 6.22 | ≥2.02*                    | 7.67 <sup>b,d</sup><br>± 0.33 | <b>≥ 4.19<sup>b,d</sup></b><br>± 0.33 |
| C | 80 | 30 | 6.22 | <b>≥ 4.38<sup>e</sup></b> | n.d.                          | n.d.                                  |

159 **Table 1: Comparison of log<sub>10</sub> reduction of SARS CoV-2 and vaccinia viral titres**  
 160 **by three different formulations used for either surface or hand disinfection.**  
 161 **Experiments indicating a ≥ 4 log<sub>10</sub> reduction of viral titer are given in bold.**

162 <sup>a</sup>Test was carried out according to the DVV/RKI guideline using 10 % fetal calf  
 163 serum as organic load instead of 0,03% bovine serum albumin.

164 <sup>b</sup>Test virus used: strain modified virus Ankara (MVA) ATCC VR -1508

165 <sup>c</sup> Test virus used: strain Elstree

166 <sup>d</sup>Test was carried out according EN 14476 using 0,03% bovine serum albumin as  
 167 organic load.

168 <sup>e</sup>RF value was acquired by large volume plating.

169 \*pre-screening experiments: data is based on n=1; due to cytotoxicity of the tested  
 170 substance the detection limit did not allow to detect higher virus reduction.

171 n.d.: not determined

172

173 Formulation A (alcoholic surface disinfectant) effectively inactivated SARS-CoV-2 by  
174  $\geq 4,02 \log_{10}$  within 15 seconds already at a 20% (v/v) dilution. In comparison,  
175 formulation A was not found to be effective under these conditions when using the  
176 surrogate test virus MVA. Here, a RF  $\geq 4.25 \log_{10}$  was obtained, when using the  
177 higher test concentration of 90% (v/v), indicating a higher stability of MVA to  
178 formulation A compared to SARS-CoV-2.

179 Formulation B was also found to be effective against SARS-CoV-2 under the chosen  
180 test parameters, indicated by  $\geq 4 \log_{10}$  RF within 15 seconds at a concentration of 20%  
181 and 80% (v/v), respectively. When using the surrogate test virus vaccinia strain  
182 Elstree, formulation B was found to be effective within 30 seconds contact time.  
183 Interestingly, this formulation was found to be ineffective against vaccinia strain  
184 Elstree when tested in a 10 % (v/v) dilution within 60 seconds based on preliminary  
185 data from our lab, i.e. RF = 0,25  $\log_{10}$ . However, for this formulation further data are  
186 needed to evaluate, whether this formulation would be effective against vaccinia  
187 strain Elstree meeting the 4  $\log_{10}$  requirement also within 15 seconds.

188 Formulation C was found to give  $\geq 4,02 \log_{10}$  RF within 15 seconds at 20 % (v/v)  
189 when using SARS-CoV-2 as a test virus. For MVA only the 80% (v/v) concentration  
190 was found to result in a  $\geq 4,19 \log_{10}$  RF, whereas the 20 % (v/v) concentration was  
191 not found to equally inactivate MVA, indicated by 0,17  $\log_{10}$  RF.

192 The data presented in this study indicate that the enveloped SARS-CoV-2 is more  
193 susceptible to the tested alcoholic biocidal formulations (A and C) compared to the  
194 enveloped MVA, which has been established as a surrogate standard test virus in  
195 European and German test protocols. For QAC-based formulation B, our data also

196 indicate that SARS-CoV-2 is at least equally susceptible compared to the standard  
197 test virus vaccinia strain Elstree. Preliminary data from our lab even indicate a more  
198 limited stability of SARS-CoV-2 to the QAC-based formulation when compared to  
199 vaccinia virus, which needs to be verified in future studies. This finding is in good  
200 agreement with recently published data indicating a good efficacy of QAC-based  
201 formulations against three different SARS-CoV-2 strains within 30 s contact time [9].

202 In conclusion, data from our study undermine the validity of the surrogate test strain  
203 concept as established by national and international institutions such as the DVV in  
204 Germany and the European Standardization Committee (CEN). This is in good  
205 alignment with earlier published data investigating the chemical susceptibility of the  
206 human pathogen *Candida auris* compared to the surrogate test organism *Candida*  
207 *albicans* [10]. In the present study as well as in the above mentioned earlier study  
208 the surrogate test virus and the surrogate test yeast, respectively were found to be  
209 more resistant to the applied chemical disinfectants than the targeted outbreak  
210 organism.

211 Thus, based on the surrogate concept chemical disinfectants claiming “virucidal  
212 activity against enveloped viruses” will be an effective choice to target enveloped  
213 SARS-CoV-2 as a preventive measure.

214

#### 215 **Conflict of Interest**

216 The authors KS and LP are employees of Schülke & Mayr GmbH, Norderstedt,  
217 Germany.

#### 218 **Funding**

219 This study was funded by Schülke & Mayr GmbH, Norderstedt, Germany.

## 220 Literature

221

222 1. World Health Organization (WHO). 2020.  
223 [https://www.who.int/emergencies/diseases/novel-coronavirus-](https://www.who.int/emergencies/diseases/novel-coronavirus-2019/interactive-timeline#!)  
224 [2019/interactive-timeline#!](https://www.who.int/emergencies/diseases/novel-coronavirus-2019/interactive-timeline#!)

225

226 2. World Health Organization (WHO): Weekly Epidemiological and Operational  
227 updates October 2020. Coronavirus disease 2019 (COVID-19) 6 October  
228 2020. [https://www.who.int/docs/default-source/coronaviruse/situation-](https://www.who.int/docs/default-source/coronaviruse/situation-reports/20201012-weekly-epi-update-9.pdf)  
229 [reports/20201012-weekly-epi-update-9.pdf](https://www.who.int/docs/default-source/coronaviruse/situation-reports/20201012-weekly-epi-update-9.pdf)

230

231 3. World Health Organization (WHO): Infection prevention and control during  
232 health care when novel coronavirus (nCoV) infection is suspected. Interim  
233 guidance. 2020. WHO/2019-nCoV/IPC/v2020.1

234

235 4. Robert Koch-Institut (RKI): Empfehlungen des RKI für die  
236 Hygienemaßnahmen und Infektionskontrolle bei Patienten mit Pneumonien  
237 verursacht durch ein neuartiges Coronavirus (nCoV) aus Wuhan, China.  
238 2020.  
239 [https://www.rki.de/DE/Content/InfAZ/N/Neuartiges\\_Coronavirus/Hygiene.html](https://www.rki.de/DE/Content/InfAZ/N/Neuartiges_Coronavirus/Hygiene.html)

240

241 5. European Committee for Standardization. European Standard EN 14885:  
242 Chemical disinfectants and antiseptics – Application of European Standards  
243 for chemical disinfectants and antiseptics. Brussels 2018

244

245 6. European Committee for Standardization. European Standard EN 14476:  
246 Chemical disinfectants and antiseptics – Quantitative suspension test for the  
247 evaluation of virucidal activity in the medical area – Test method and  
248 requirements (Phase 2 / Step 1). Brussels 2019

249

250 7. Rabenau HF, Schwebke I, Blümel J et al. Leitlinie der Deutschen Vereinigung  
251 zur Bekämpfung der Viruskrankheiten (DVV) e. V. und des Robert Koch-  
252 Instituts (RKI) zur Prüfung von chemischen Desinfektionsmitteln auf  
253 Wirksamkeit gegen Viren in der Humanmedizin. Bundesgesundheitsbl. 58,  
254 493–504 (2015). <https://doi.org/10.1007/s00103-015-2131-8>

255

256 8. Heilingloh CS, Aufderhorst UW, Schipper L, et al. Susceptibility of SARS-  
257 CoV-2 to UV irradiation. American Journal of Infection Control. 2020  
258 Oct;48(10):1273-1275. DOI: 10.1016/j.ajic.2020.07.031.

259

260 9. Meister TL, Brüggemann Y, Todt D et al. Virucidal efficacy of different oral  
261 rinses against severe acute respiratory coronavirus 2. J Infect Dis. 2020;  
262 [doi.org/10.1093/infdis/jiaa471](https://doi.org/10.1093/infdis/jiaa471)

263

264 10. Müller P, Tan CK, Ißleib U et al.: Investigation of the susceptibility of *Candida*  
265 *auris* and *Candida albicans* to chemical disinfectants using European  
266 Standards EN 13624 and EN 16615. J Hosp Infect (2020)  
267 [doi.org/10.1016/j.jhin.2020.05.026](https://doi.org/10.1016/j.jhin.2020.05.026)

268

269
